# Supplementary material for: A critical assessment of SELDI-TOF-MS for biomarker discovery in serum and tissue of patients with an ovarian mass
Source: PubMed Central journal article supplement (PMC3494530; doi:10.1186/1477-5956-10-45), 2012-07-23

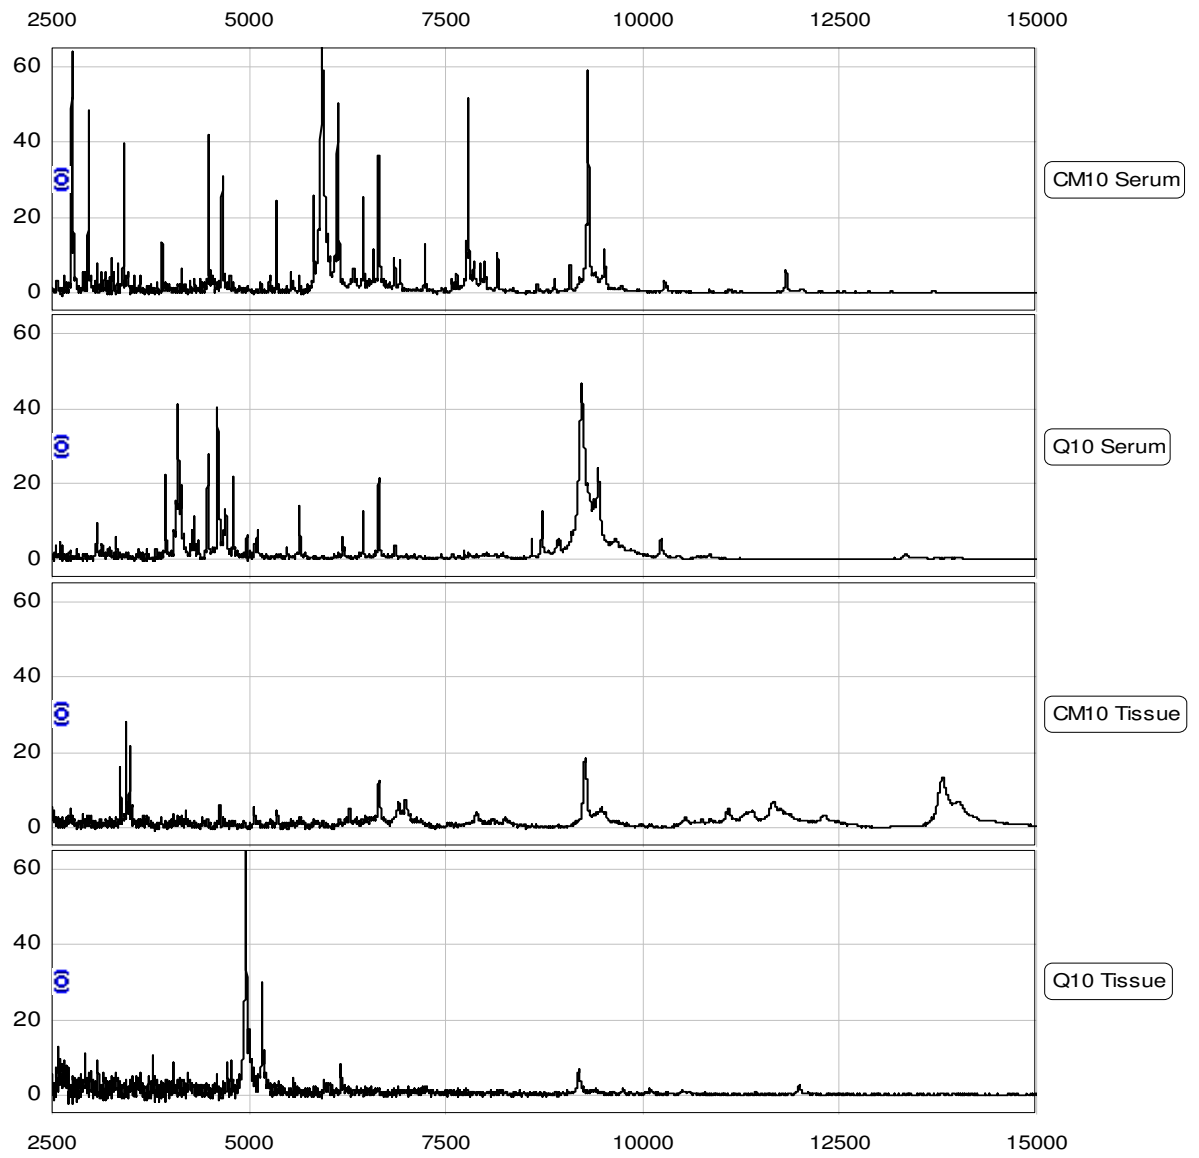

Supplement: 1477-5956-10-45-S1.pdf [file 1477-5956-10-45-S1.pdf]
